# Supplementary material
Source: publisher figshare collection journal article supplement (https://karger.figshare.com/ndownloader/files/24874883)
Supplement: Supplementary file 1 [file 24874883]

## Sheet: Tabelle1
Supplementary Table 5 Results of the GBB in patients with PKU in comparison to the German age-matched average population
Item	General population*							PKU population
	not at all	little	to some extent	moderate	very burdensome	no affection	burdensome	not at all	little	to some extent	moderate	very burdensome	no affection	burdensome
	%	%	%	%	%	%	%	%	%	%	%	%	%	%
Exhaustion
Weakness	0.55	0.29	0.12	0.03	0.01	0.84	0.16	0.64	0.22	0.11	0.03	0	0.86	0.14
Increased need of sleep	0.61	0.22	0.12	0.04	0.01	0.83	0.17	0.52	0.15	0.24	0.05	0.04	0.67	0.33
Exhaustibility	0.56	0.23	0.14	0.04	0.01	0.79	0.19	0.49	0.21	0.21	0.06	0.03	0.7	0.3
Fatigue	0.48	0.29	0.17	0.05	0.01	0.77	0.23	0.49	0.21	0.21	0.06	0.03	0.7	0.3
Dizziness	0.75	0.16	0.06	0.02	0	0.91	0.08	0.85	0.11	0.01	0.02	0.01	0.96	0.04
Weariness	0.48	0.29	0.18	0.05	0	0.77	0.23	0.35	0.33	0.21	0.06	0.05	0.68	0.32
Stomach discomfort
Bloating	0.66	0.22	0.08	0.03	0	0.88	0.11	0.63	0.18	0.15	0.01	0.03	0.81	0.19
Vomiting	0.89	0.08	0.02	0.01	0	0.97	0.03	0.9	0.06	0.03	0.01	0	0.96	0.04
Nausea	0.86	0.1	0.02	0.01	0	0.96	0.03	0.82	0.11	0.06	0.01	0	0.93	0.07
Burping	0.72	0.2	0.06	0.01	0.01	0.92	0.08	0.73	0.16	0.08	0.02	0.01	0.89	0.11
Heart burn	0.65	0.22	0.08	0.03	0.01	0.87	0.12	0.72	0.17	0.08	0.01	0.02	0.89	0.11
Stomach pain	0.72	0.2	0.06	0.01	0	0.92	0.07	0.75	0.12	0.08	0.04	0.01	0.87	0.13
Pain
Limb pain	0.43	0.23	0.22	0.09	0.03	0.66	0.34	0.65	0.22	0.1	0.02	0.01	0.87	0.13
Back pain	0.36	0.25	0.25	0.11	0.03	0.61	0.39	0.4	0.27	0.22	0.07	0.04	0.67	0.33
Neck pain	0.39	0.26	0.23	0.09	0.02	0.65	0.34	0.47	0.24	0.19	0.07	0.03	0.71	0.29
Headache	0.35	0.37	0.21	0.06	0.02	0.72	0.29	0.4	0.35	0.16	0.06	0.03	0.75	0.25
Tired legs	0.52	0.26	0.16	0.05	0.01	0.78	0.22	0.72	0.17	0.08	0.02	0.01	0.89	0.11
Head pressure	0.71	0.18	0.08	0.02	0.01	0.89	0.11	0.69	0.18	0.1	0	0.03	0.87	0.13
Heart problems
Palpitation	0.62	0.23	0.11	0.04	0	0.85	0.15	0.78	0.14	0.06	0.01	0.01	0.92	0.08
Vertigo	0.67	0.2	0.09	0.03	0.01	0.87	0.13	0.69	0.2	0.08	0.02	0.01	0.89	0.11
Lump in the throat	0.86	0.1	0.03	0.01	0	0.96	0.04	0.83	0.12	0.04	0.01	0	0.95	0.05
Chest pain	0.76	0.16	0.07	0.02	0	0.92	0.09	0.74	0.17	0.05	0.04	0	0.91	0.09
Dyspnea	0.81	0.12	0.05	0.01	0	0.93	0.06	0.91	0.05	0.03	0.01	0	0.96	0.04
Heart complaints	0.78	0.13	0.06	0.02	0	0.91	0.08	0.95	0.04	0.01	0	0	0.99	0.01
* as indicated by Brähler et al 2008
The answers "not at all" and "littke were rated as "no affection"; the answers “to some extent”, “moderate”, and “very burdensome” were rated as "burdensome".
